# Supplementary material
Source: MDPI journal article supplement (https://www.mdpi.com/2071-1050/16/7/2955)
Supplement: s1 [file s1]

## Supplementary data

Table S1 Diet matrix of the control ecosystem, the proportion of each prey group in the predator's diet is indicated by the displayed values

| Number | Prey\predator        | 1     | 2     | 3     | 4     | 5     | 6     | 7     |
|--------|----------------------|-------|-------|-------|-------|-------|-------|-------|
| 1      | The largemouth bass  |       |       |       |       |       |       |       |
| 2      | Macrobenthos         | 0.001 |       |       |       |       |       |       |
| 3      | Microbenthos         |       | 0.090 |       |       |       |       |       |
| 4      | Macrozooplankton     | 0.001 |       |       |       |       |       |       |
| 5      | Microzooplankton     |       |       |       | 0.075 |       |       |       |
| 6      | Bacterioplankton     |       |       |       | 0.090 | 0.050 |       |       |
| 7      | Benthic bacteria     |       | 0.050 | 0.650 |       |       |       |       |
| 8      | Micro-phytoplankton  |       |       |       | 0.106 | 0.212 |       |       |
| 9      | Nano-phytoplankton   |       |       |       | 0.095 | 0.214 |       |       |
| 10     | Pico-phytoplankton   |       |       |       | 0.085 | 0.254 |       |       |
| 11     | Iced fish            | 0.850 | 0.100 | 0.100 | 0.499 |       |       |       |
| 12     | Detritus in water    |       |       |       |       | 0.130 | 0.950 | 0.050 |
| 13     | Detritus in sediment | 0.148 | 0.760 | 0.250 | 0.050 | 0.140 | 0.050 | 0.950 |

Table S2 Diet matrix of the treatment ecosystem, the proportion of each prey group in the predator's diet is indicated by the displayed values

| Number | Prey\predator        | 1     | 2     | 3     | 4     | 5     | 6     | 7     |
|--------|----------------------|-------|-------|-------|-------|-------|-------|-------|
| 1      | The largemouth bass  |       |       |       |       |       |       |       |
| 2      | Macrobenthos         | 0.001 |       |       |       |       |       |       |
| 3      | Microbenthos         |       | 0.050 |       |       |       |       |       |
| 4      | Macrozooplankton     | 0.001 |       |       |       |       |       |       |
| 5      | Microzooplankton     |       |       |       | 0.075 |       |       |       |
| 6      | Bacterioplankton     |       |       |       | 0.100 | 0.065 |       |       |
| 7      | Benthic bacteria     |       | 0.050 | 0.550 |       |       |       |       |
| 8      | Micro-phytoplankton  |       |       |       | 0.100 | 0.210 |       |       |
| 9      | Nano-phytoplankton   |       |       |       | 0.100 | 0.210 |       |       |
| 10     | Pico-phytoplankton   |       |       |       | 0.100 | 0.195 |       |       |
| 11     | Periphyton           | 0.001 |       | 0.010 | 0.010 | 0.010 |       |       |
| 12     | Iced fish            | 0.960 | 0.125 | 0.130 | 0.410 |       |       |       |
| 13     | Detritus in water    |       | 0.010 | 0.005 | 0.005 | 0.150 | 0.950 | 0.050 |
| 14     | Detritus in sediment | 0.037 | 0.765 | 0.305 | 0.100 | 0.160 | 0.050 | 0.950 |

Table S3 Harvest information of cultured animals in these two ecosystems

|                              | Control ecosystem  | Treatment ecosystem |
|------------------------------|--------------------|---------------------|
| Feed conversion rate (FCR)   | 4.067±0.058        | 3.867±0.058*        |
| Body weight (kg)             | 0.626±0.044        | 0.642±0.027         |
| Survival rate (%)            | 79.352±3.476       | 91.718±5.721*       |
| Yield (kg·hm <sup>-2</sup> ) | 39666.667±1527.525 | 47050.000±1003.743* |

Data were presented as means ± SD. “\*” means significant difference compared with control group ( $P < 0.05$ )
